# Supplementary material for: Adherence to the EAT‐Lancet Healthy Reference Diet in Relation to Risk of Cardiovascular Events and Environmental Impact: Results From the EPIC‐NL Cohort
Source: PubMed Central journal article supplement (PMC10227249; doi:10.1161/jaha.122.026318), 2023-04-17
Supplement: JAH3-12-e026318-s001.pdf [file JAH3-12-e026318-s001.pdf]

# **SUPPLEMENTAL MATERIAL**

**Table S1. Construction of HRD-score, intake recommendations (g/day) and scoring system for men based on 2500 kcal/day.**

| <b>Food Group</b>                                   | <b>Component type*</b> | <b>HRD recommendation (g/day)</b> | <b>Minimum score (0 points)</b> | <b>Proportional score</b> | <b>Maximum points (10 points)</b> | <b>Proportional score</b> |
|-----------------------------------------------------|------------------------|-----------------------------------|---------------------------------|---------------------------|-----------------------------------|---------------------------|
| <b>Whole Grains<sup>†</sup></b>                     |                        |                                   |                                 |                           |                                   |                           |
| Rice, wheat, corn, and other                        | A                      | 464 (or 60% of total energy)      | 0 g/d                           | 0-464 g/d                 | ≥464 g/d                          |                           |
| <b>Vegetables</b>                                   |                        |                                   |                                 |                           |                                   |                           |
| All vegetables <sup>‡</sup>                         | A                      | 300                               | 0 g/d                           | 0-300 g/d                 | ≥300 g/d                          |                           |
| <b>Fruits</b>                                       |                        |                                   |                                 |                           |                                   |                           |
| All fruit <sup>§</sup>                              | A                      | 200                               | 0 g/d                           | 0-200 g/d                 | ≥200 g/d                          |                           |
| <b>Tubers or starchy vegetables</b>                 |                        |                                   |                                 |                           |                                   |                           |
| Potatoes and cassava                                | O                      | 50                                | 0 g/d                           | 0-50 g/d                  | 50-100 g/d                        | 100-150 g/d               |
| <b>Dairy foods</b>                                  |                        |                                   |                                 |                           |                                   |                           |
| Whole milk or derivative equivalents (e.g., cheese) | O                      | 250                               | 0 g/d                           | 0-250 g/d                 | 250 – 500 g/d                     | 500-750 g/d               |
| <b>Protein Sources</b>                              |                        |                                   |                                 |                           |                                   |                           |
| Dry beans, lentils, and peas                        | A                      | 50                                | 0 g/d                           | 0-50 g/d                  | ≥50 g/d                           |                           |
| Soy foods                                           | A                      | 25                                | 0 g/d                           | 0-25 g/d                  | ≥25 g/d                           |                           |
| Beef, lamb and pork                                 | M                      | 14                                | ≥14 g/d                         | 14 -0 g/d                 | 0 g/d                             |                           |
| Chicken and other poultry                           | O                      | 29                                | 0 g/d                           | 0-29 g/d                  | 29-58 g/d                         | 58-88 g/d                 |
| Eggs                                                | O                      | 13                                | 0 g/d                           | 0-13 g/d                  | 13-25 g/d                         | 25-38 g/d                 |

|                             |   |     |                         |          |                         |             |
|-----------------------------|---|-----|-------------------------|----------|-------------------------|-------------|
| Fish                        | O | 28  | 0 g/d                   | 0-28 g/d | 28-100 g/d              | 100-128 g/d |
| Nuts                        | O | 50  | 0 g/d                   | 0-50 g/d | 50-100 g/d              | 100-150 g/d |
| <b>Added sugars</b>         |   |     |                         |          |                         |             |
| All sweeteners              | M | 31  | ≥31 g/d                 | 31-0 g/d | 0 g/d                   |             |
| <b>Added fats</b>           |   |     |                         |          |                         |             |
| Palm oil                    | R | 6.8 | No consumption of       |          | No consumption of       |             |
| unsaturated oils            |   | 40  | unsaturated fats OR     |          | saturated fats OR ratio |             |
| dairy fats included in milk |   | 0   | ratio of unsaturated to |          | of unsaturated to       |             |
| lard and tallow             |   | 5   | saturated fats of ≤0.6  |          | saturated fats of ≥13   |             |

---

\*A = adequacy component; O = optimum component; M = moderation component; R = ratio component.

† Reference diet refers to dry, raw weight. Recommendations for whole grains were converted, as described by Dooren et al.<sup>39</sup>

‡ Including dark green vegetables, red and orange vegetables, other vegetables.

§ Excluding fruit juice.

|| Cut-offs and threshold values were derived from the 15th percentile and 85th percentile of the intake distribution of the Dutch reference population, as described in Looman et al.<sup>15</sup>

**Table S2. Construction of HRD-score, intake recommendations (g/day) and scoring system for women based on 2000 kcal/day.**

| <b>Food Group</b>                                   | <b>Component type*</b> | <b>HRD recommendation (g/day)</b> | <b>Minimum score (0 points)</b> | <b>Proportional score</b> | <b>Maximum points (10 points)</b> | <b>Proportional score</b> |
|-----------------------------------------------------|------------------------|-----------------------------------|---------------------------------|---------------------------|-----------------------------------|---------------------------|
| <b>Whole Grains<sup>†</sup></b>                     |                        |                                   |                                 |                           |                                   |                           |
| Rice, wheat, corn, and other                        | A                      | 372 (or 60%en)                    | 0 g/d                           | 0-372 g/d                 | ≥372 g/d                          |                           |
| <b>Vegetables</b>                                   |                        |                                   |                                 |                           |                                   |                           |
| All vegetables <sup>‡</sup>                         | A                      | 240                               | 0 g/d                           | 0-240 g/d                 | ≥240 g/d                          |                           |
| <b>Fruits</b>                                       |                        |                                   |                                 |                           |                                   |                           |
| All fruit§                                          | A                      | 160                               | 0 g/d                           | 0-160 g/d                 | ≥160 g/d                          |                           |
| <b>Tubers or starchy vegetables</b>                 |                        |                                   |                                 |                           |                                   |                           |
| Potatoes and cassava                                | O                      | 40                                | 0 g/d                           | 0-40 g/d                  | 40-80 g/d                         | 80-120 g/d                |
| <b>Dairy foods</b>                                  |                        |                                   |                                 |                           |                                   |                           |
| Whole milk or derivative equivalents (e.g., cheese) | O                      | 200                               | 0 g/d                           | 0-200 g/d                 | 200 – 400 g/d                     | 400-600 g/d               |
| <b>Protein Sources</b>                              |                        |                                   |                                 |                           |                                   |                           |
| Dry beans, lentils, and peas                        | A                      | 40                                | 0 g/d                           | 0-40 g/d                  | ≥40 g/d                           |                           |
| Soy foods                                           | A                      | 20                                | 0 g/d                           | 0-20 g/d                  | ≥20 g/d                           |                           |
| Beef, lamb and pork                                 | M                      | 12                                | ≥12 g/d                         | 12-0 g/d                  | 0 g/d                             |                           |
| Chicken and other poultry                           | O                      | 23                                | 0 g/d                           | 0-23 g/d                  | 23-46 g/d                         | 46-69 g/d                 |
| Eggs                                                | O                      | 10                                | 0 g/d                           | 0-10 g/d                  | 10-20 g/d                         | 20-30 g/d                 |
| Fish                                                | O                      | 22                                | 0 g/d                           | 0-22 g/d                  | 22-80 g/d                         | 80-102 g/d                |

|                             |   |    |                         |          |                         |            |
|-----------------------------|---|----|-------------------------|----------|-------------------------|------------|
| Nuts                        | O | 40 | 0 g/d                   | 0-40 g/d | 40-80 g/d               | 80-120 g/d |
| <b>Added sugars</b>         |   |    |                         |          |                         |            |
| All sweeteners              | M | 25 | ≥25 g/d                 | 25-0 g/d | 0 g/d                   |            |
| <b>Added fats</b>           |   |    |                         |          |                         |            |
| Palm oil                    | R | 5  | No consumption of       |          | No consumption of       |            |
| unsaturated oils            |   | 32 | unsaturated fats OR     |          | unsaturated fats OR     |            |
| dairy fats included in milk |   | 0  | ratio of unsaturated to |          | ratio of unsaturated to |            |
| lard and tallow             |   | 4  | saturated fats of ≤0.5  |          | saturated fats of ≤0.5  |            |

\*A = adequacy component; O = optimum component; M = moderation component; R = ratio component.

† Reference diet refers to dry, raw weight. Recommendations for whole grains were converted, as described by Dooren et al.<sup>39</sup>

‡ Including dark green vegetables, red and orange vegetables, other vegetables.

§ Excluding fruit juice.

|| Cut-offs and threshold values were derived from the 15th percentile and 85th percentile of the intake distribution of the Dutch reference population, as described in Looman et al.<sup>15</sup>

**Table S3. Hazard ratios (HRs) and 95% confidence intervals (CIs) for the association between HRDea-score (continuous) and incidence of CVD, CHD, total, ischaemic, and haemorrhagic stroke ( $n=35,496$ ).**

|                               |       | HRDea-score |               |         |
|-------------------------------|-------|-------------|---------------|---------|
| Outcome                       |       | HR          | 95% CI        | P-value |
| CVD, <i>n</i>                 | 4,153 |             |               |         |
| Unadjusted Model              |       | 0.92        | (0.89 – 0.95) | <0.001  |
| Model 1 <sup>a</sup>          |       | 0.87        | (0.84 – 0.90) | <0.001  |
| Model 2 <sup>b</sup>          |       | 0.91        | (0.88 – 0.95) | <0.001  |
| Model 3 <sup>c</sup>          |       | 0.93        | (0.89 – 0.96) | <0.001  |
| CHD, <i>n</i>                 | 2,355 |             |               |         |
| Unadjusted Model              |       | 0.90        | (0.86 – 0.93) | <0.001  |
| Model 1 <sup>a</sup>          |       | 0.87        | (0.83 – 0.91) | <0.001  |
| Model 2 <sup>b</sup>          |       | 0.92        | (0.88 – 0.97) | 0.001   |
| Model 3 <sup>c</sup>          |       | 0.94        | (0.89 – 0.98) | 0.007   |
| Total Stroke, <i>n</i>        | 838   |             |               |         |
| Unadjusted Model              |       | 1.01        | (0.94 - 1.08) | 0.781   |
| Model 1 <sup>a</sup>          |       | 0.91        | (0.84 – 0.98) | 0.013   |
| Model 2 <sup>b</sup>          |       | 0.95        | (0.88 – 1.03) | 0.232   |
| Model 3 <sup>c</sup>          |       | 0.96        | (0.88 – 1.04) | 0.309   |
| Ischemic stroke, <i>n</i>     | 478   |             |               |         |
| Unadjusted Model              |       | 1.06        | (0.97 - 1.17) | 0.218   |
| Model 1 <sup>a</sup>          |       | 0.96        | (0.87 - 1.06) | 0.372   |
| Model 2 <sup>b</sup>          |       | 1.00        | (0.90 – 1.11) | 0.950   |
| Model 3 <sup>c</sup>          |       | 1.01        | (0.90 – 1.12) | 0.890   |
| Haemorrhagic stroke, <i>n</i> | 233   |             |               |         |
| Unadjusted Model              |       | 0.97        | (0.85 - 1.10) | 0.594   |
| Model 1 <sup>a</sup>          |       | 0.84        | (0.73 – 0.97) | 0.018   |
| Model 2 <sup>b</sup>          |       | 0.89        | (0.77 – 1.04) | 0.140   |
| Model 3 <sup>c</sup>          |       | 0.90        | (0.77 – 1.05) | 0.164   |

<sup>a</sup> Adjusted for age and sex. <sup>b</sup> Adjusted for age, sex, educational level, smoking status, alcohol consumption, physical activity, and energy intake. <sup>c</sup> Adjusted for age, sex, educational level, smoking status, alcohol consumption, physical activity, energy intake, BMI, hypertension, and total cholesterol levels.

HR = Hazard Ratios

95% CI = 95% Confidence Intervals

HRDea-score = Energy-adjusted Healthy Reference Diet score

CVD = cardiovascular disease

CHD = coronary heart disease

**Table S4. Hazard ratios (HRs) and 95% confidence intervals (CIs) for the association between quartiles of the HRDea-score and incidence of cardiovascular disease events, excluding, one at a time, each component of the HRDea-score (n=35,496).**

|                                         | HRDea-score            |                        |                        |                         | P-trend |
|-----------------------------------------|------------------------|------------------------|------------------------|-------------------------|---------|
|                                         | Q1 (32-66)<br>(n=8874) | Q2 (67-73)<br>(n=8874) | Q3 (74-79)<br>(n=8874) | Q4 (80-117)<br>(n=8874) |         |
| HR (95% CI)                             |                        |                        |                        |                         |         |
| HRDea-score<br>recalculated excluding*: |                        |                        |                        |                         |         |
| Whole Grains                            | 1.00 [Reference]       | 0.95 (0.87, 1.04)      | 0.85 (0.78, 0.93)      | 0.85 (0.77, 0.93)       | <0.001  |
| Vegetables                              | 1.00 [Reference]       | 0.99 (0.91, 1.08)      | 0.83 (0.76, 0.91)      | 0.86 (0.78, 0.95)       | <0.001  |
| Fruit                                   | 1.00 [Reference]       | 0.91 (0.83, 0.99)      | 0.84 (0.77, 0.92)      | 0.85 (0.77, 0.94)       | <0.001  |
| Potatoes                                | 1.00 [Reference]       | 0.95 (0.88, 1.03)      | 0.90 (0.83, 0.98)      | 0.91 (0.83, 0.99)       | 0.012   |
| Dairy                                   | 1.00 [Reference]       | 0.96 (0.88, 1.04)      | 0.87 (0.80, 0.95)      | 0.83 (0.75, 0.91)       | <0.001  |
| Legumes                                 | 1.00 [Reference]       | 0.90 (0.82, 0.98)      | 0.79 (0.72, 0.87)      | 0.80 (0.73, 0.89)       | <0.001  |
| Soy                                     | 1.00 [Reference]       | 0.98 (0.90, 1.07)      | 0.86 (0.79, 0.94)      | 0.83 (0.75, 0.91)       | <0.001  |
| Beef, Lamb, Pork                        | 1.00 [Reference]       | 0.96 (0.88, 1.04)      | 0.83 (0.76, 0.90)      | 0.82 (0.74, 0.89)       | <0.001  |
| Chicken                                 | 1.00 [Reference]       | 0.97 (0.89, 1.05)      | 0.83 (0.76, 0.90)      | 0.83 (0.75, 0.90)       | <0.001  |
| Eggs                                    | 1.00 [Reference]       | 0.94 (0.87, 1.02)      | 0.86 (0.79, 0.94)      | 0.82 (0.75, 0.90)       | <0.001  |
| Fish                                    | 1.00 [Reference]       | 0.97 (0.90, 1.05)      | 0.82 (0.75, 0.89)      | 0.83 (0.76, 0.91)       | <0.001  |
| Nuts                                    | 1.00 [Reference]       | 0.97 (0.90, 1.05)      | 0.82 (0.75, 0.89)      | 0.83 (0.76, 0.91)       | <0.001  |
| Sugars                                  | 1.00 [Reference]       | 0.95 (0.88, 1.03)      | 0.81 (0.74, 0.88)      | 0.81 (0.74, 0.89)       | <0.001  |
| Fats ratio                              | 1.00 [Reference]       | 0.93 (0.86, 1.01)      | 0.81 (0.74, 0.88)      | 0.80 (0.73, 0.88)       | <0.001  |

\*Adjusted for: sex, age, educational level, smoking status, alcohol consumption, physical activity, energy intake, BMI, hypertension, and cholesterol levels.

Q1 = first quartile

Q2 = second quartile

Q3 = third quartile

Q4 = fourth quartile

HR = Hazard Ratios

95% CI = 95% Confidence Intervals

p-trend = p-value for trend

HRDea-score = Energy-adjusted Healthy Reference Diet score

CVD = cardiovascular disease

**Table S5. Hazard ratios (HRs) and 95% confidence intervals (CIs) for the association between quartiles of HRDea-score and CHD, excluding, one at a time, each component of the HRD-score (n=35,496).**

|                                    | HRDea-score            |                        |                        |                         | P-trend |
|------------------------------------|------------------------|------------------------|------------------------|-------------------------|---------|
|                                    | Q1 (32-66)<br>(n=8874) | Q2 (67-73)<br>(n=8874) | Q3 (74-79)<br>(n=8874) | Q4 (80-117)<br>(n=8874) |         |
| HR (95% CI)                        |                        |                        |                        |                         |         |
| HRD-score recalculated excluding*: |                        |                        |                        |                         |         |
| Whole Grains                       | 1.00 [Reference]       | 0.94 (0.84 – 1.05)     | 0.87 (0.77 – 0.98)     | 0.89 (0.78 – 1.01)      | 0.034   |
| Vegetables                         | 1.00 [Reference]       | 1.01 (0.90 – 1.13)     | 0.89 (0.79 – 1.00)     | 0.92 (0.81 – 1.04)      | 0.061   |
| Fruit                              | 1.00 [Reference]       | 0.97 (0.87 – 1.08)     | 0.87 (0.77 – 0.98)     | 0.90 (0.79 – 1.02)      | 0.037   |
| Potatoes                           | 1.00 [Reference]       | 1.00 (0.89 – 1.12)     | 0.97 (0.86 – 1.08)     | 0.95 (0.85 – 1.08)      | 0.397   |
| Dairy                              | 1.00 [Reference]       | 0.98 (0.88 – 1.10)     | 0.91 (0.81 – 1.03)     | 0.86 (0.75 – 0.98)      | 0.016   |
| Legumes                            | 1.00 [Reference]       | 0.94 (0.84 – 1.05)     | 0.88 (0.78 – 0.99)     | 0.83 (0.73 – 0.94)      | 0.002   |
| Soy                                | 1.00 [Reference]       | 0.97 (0.87 – 1.09)     | 0.88 (0.78 – 0.99)     | 0.85 (0.75 – 0.97)      | 0.006   |
| Beef, Lamb, Pork                   | 1.00 [Reference]       | 0.97 (0.87 – 1.09)     | 0.88 (0.78 – 1.00)     | 0.87 (0.76 – 0.99)      | 0.013   |
| Chicken                            | 1.00 [Reference]       | 1.00 (0.89 – 1.11)     | 0.90 (0.80 – 1.01)     | 0.89 (0.78 – 1.01)      | 0.032   |
| Eggs                               | 1.00 [Reference]       | 0.96 (0.86 – 1.07)     | 0.88 (0.78 – 0.99)     | 0.89 (0.78 – 1.01)      | 0.034   |
| Fish                               | 1.00 [Reference]       | 0.99 (0.89 – 1.11)     | 0.88 (0.78 – 0.99)     | 0.88 (0.77 – 1.00)      | 0.016   |
| Nuts                               | 1.00 [Reference]       | 0.99 (0.88 – 1.11)     | 0.88 (0.78 – 1.00)     | 0.88 (0.77 – 1.00)      | 0.017   |
| Sugars                             | 1.00 [Reference]       | 0.97 (0.86 – 1.08)     | 0.87 (0.77 – 0.98)     | 0.85 (0.75 – 0.97)      | 0.006   |
| Fats ratio                         | 1.00 [Reference]       | 0.94 (0.84 – 1.05)     | 0.84 (0.75 – 0.95)     | 0.86 (0.76 – 0.98)      | 0.006   |

\* Adjusted for: sex, age, educational level, smoking status, alcohol consumption, physical activity, energy intake, BMI, hypertension, and cholesterol levels.

Q1 = first quartile

Q2 = second quartile

Q3 = third quartile

Q4 = fourth quartile

HR = Hazard Ratios

95% CI = 95% Confidence Intervals

p-trend = p-value for trend

HRDea-score = Energy-adjusted Healthy Reference Diet score

CHD = coronary heart disease



**Table S6. Hazard ratios (HRs) and 95% confidence intervals (CIs) for the association between quartiles of the HRDea-score and incidence of total stroke, excluding, one at a time, each component of the HRD-score (n=35,496).**

|                                         | HRDea-score            |                        |                        |                         | P-trend |
|-----------------------------------------|------------------------|------------------------|------------------------|-------------------------|---------|
|                                         | Q1 (32-66)<br>(n=8874) | Q2 (67-73)<br>(n=8874) | Q3 (74-79)<br>(n=8874) | Q4 (80-117)<br>(n=8874) |         |
| HR (95% CI)                             |                        |                        |                        |                         |         |
| HRDea-score<br>recalculated excluding*: |                        |                        |                        |                         |         |
| Whole Grains                            | 1.00 [Reference]       | 1.00 (0.82, 1.22)      | 0.93 (0.76, 1.14)      | 0.88 (0.71, 1.10)       | 0.202   |
| Vegetables                              | 1.00 [Reference]       | 0.99 (0.82, 1.21)      | 0.83 (0.68, 1.02)      | 0.88 (0.72, 1.09)       | 0.123   |
| Fruit                                   | 1.00 [Reference]       | 0.88 (0.72, 1.07)      | 0.85 (0.70, 1.04)      | 0.85 (0.69, 1.05)       | 0.129   |
| Potatoes                                | 1.00 [Reference]       | 1.05 (0.86, 1.28)      | 0.95 (0.78, 1.17)      | 1.02 (0.84, 1.25)       | 0.976   |
| Dairy                                   | 1.00 [Reference]       | 1.07 (0.88, 1.31)      | 0.95 (0.77, 1.17)      | 0.90 (0.72, 1.12)       | 0.228   |
| Legumes                                 | 1.00 [Reference]       | 0.92 (0.76, 1.11)      | 0.79 (0.64, 0.97)      | 0.82 (0.67, 1.02)       | 0.038   |
| Soy                                     | 1.00 [Reference]       | 0.99 (0.81, 1.20)      | 0.85 (0.69, 1.04)      | 0.82 (0.66, 1.01)       | 0.031   |
| Beef, Lamb, Pork                        | 1.00 [Reference]       | 1.01 (0.83, 1.23)      | 0.86 (0.70, 1.06)      | 0.84 (0.68, 1.04)       | 0.055   |
| Chicken                                 | 1.00 [Reference]       | 1.07 (0.88, 1.30)      | 0.86 (0.70, 1.06)      | 0.91 (0.74, 1.13)       | 0.170   |
| Eggs                                    | 1.00 [Reference]       | 0.94 (0.77, 1.14)      | 0.94 (0.77, 1.15)      | 0.81 (0.65, 1.00)       | 0.060   |
| Fish                                    | 1.00 [Reference]       | 1.04 (0.86, 1.27)      | 0.86 (0.70, 1.06)      | 0.89 (0.71, 1.10)       | 0.117   |
| Nuts                                    | 1.00 [Reference]       | 1.04 (0.86, 1.27)      | 0.86 (0.70, 1.06)      | 0.89 (0.72, 1.11)       | 0.132   |
| Sugars                                  | 1.00 [Reference]       | 1.00 (0.83, 1.22)      | 0.84 (0.69, 1.04)      | 0.84 (0.68, 1.04)       | 0.046   |
| Fats ratio                              | 1.00 [Reference]       | 0.97 (0.80, 1.18)      | 0.89 (0.73, 1.09)      | 0.83 (0.67, 1.03)       | 0.067   |

\* Adjusted for: sex, age, educational level, smoking status, alcohol consumption, physical activity, energy intake, BMI, hypertension, and cholesterol levels.

Q1 = first quartile

Q2 = second quartile

Q3 = third quartile

Q4 = fourth quartile

HR = Hazard Ratios

95% CI = 95% Confidence Intervals

p-trend = p-value for trend

HRDea-score = Energy-adjusted Healthy Reference Diet score

**Table S7. Hazard ratios (HRs) and 95% confidence intervals (CIs) for the association between quartiles of the HRDea-score and incidence of ischaemic stroke, excluding, one at a time, each component of the HRDea-score (n=35,496).**

|                                         | HRDea-score            |                        |                        |                         | P-trend |
|-----------------------------------------|------------------------|------------------------|------------------------|-------------------------|---------|
|                                         | Q1 (32-66)<br>(n=8874) | Q2 (67-73)<br>(n=8874) | Q3 (74-79)<br>(n=8874) | Q4 (80-117)<br>(n=8874) |         |
| HR (95% CI)                             |                        |                        |                        |                         |         |
| HRDea-score<br>recalculated excluding*: |                        |                        |                        |                         |         |
| Whole Grains                            | 1.00 [Reference]       | 0.91 (0.69, 1.19)      | 1.00 (0.76, 1.30)      | 0.87 (0.66, 1.16)       | 0.471   |
| Vegetables                              | 1.00 [Reference]       | 0.96 (0.74, 1.26)      | 0.85 (0.65, 1.12)      | 0.97 (0.74, 1.29)       | 0.722   |
| Fruit                                   | 1.00 [Reference]       | 0.86 (0.66, 1.12)      | 0.88 (0.67, 1.14)      | 0.91 (0.69, 1.20)       | 0.565   |
| Potatoes                                | 1.00 [Reference]       | 1.18 (0.90, 1.55)      | 1.02 (0.78, 1.35)      | 1.23 (0.94, 1.61)       | 0.234   |
| Dairy                                   | 1.00 [Reference]       | 1.07 (0.82, 1.39)      | 0.89 (0.67, 1.18)      | 0.99 (0.74, 1.31)       | 0.669   |
| Legumes                                 | 1.00 [Reference]       | 0.96 (0.74, 1.24)      | 0.80 (0.61, 1.06)      | 0.93 (0.70, 1.23)       | 0.431   |
| Soy                                     | 1.00 [Reference]       | 0.87 (0.67, 1.14)      | 0.92 (0.70, 1.20)      | 0.83 (0.63, 1.10)       | 0.262   |
| Beef, Lamb, Pork                        | 1.00 [Reference]       | 0.89 (0.68, 1.15)      | 0.92 (0.71, 1.20)      | 0.86 (0.65, 1.14)       | 0.359   |
| Chicken                                 | 1.00 [Reference]       | 0.97 (0.74, 1.27)      | 0.94 (0.71, 1.23)      | 0.95 (0.72, 1.26)       | 0.699   |
| Eggs                                    | 1.00 [Reference]       | 0.88 (0.67, 1.15)      | 0.98 (0.75, 1.28)      | 0.85 (0.64, 1.13)       | 0.381   |
| Fish                                    | 1.00 [Reference]       | 0.91 (0.69, 1.18)      | 0.92 (0.70, 1.21)      | 0.90 (0.68, 1.20)       | 0.528   |
| Nuts                                    | 1.00 [Reference]       | 0.92 (0.70, 1.20)      | 0.91 (0.69, 1.19)      | 0.91 (0.69, 1.21)       | 0.549   |
| Sugars                                  | 1.00 [Reference]       | 0.89 (0.69, 1.17)      | 0.92 (0.70, 1.20)      | 0.87 (0.66, 1.16)       | 0.407   |
| Fats ratio                              | 1.00 [Reference]       | 0.86 (0.66, 1.12)      | 0.94 (0.72, 1.23)      | 0.87 (0.65, 1.15)       | 0.446   |

\* Adjusted for: sex, age, educational level, smoking status, alcohol consumption, physical activity, energy intake, BMI, hypertension, and cholesterol levels.

Q1 = first quartile

Q2 = second quartile

Q3 = third quartile

Q4 = fourth quartile

HR = Hazard Ratios

95% CI = 95% Confidence Intervals

p-trend = p-value for trend

HRDea-score = Energy-adjusted Healthy Reference Diet score

**Table S8. Hazard ratios (HRs) and 95% confidence intervals (CIs) for the association between quartiles of the HRDea-score and incidence of haemorrhagic stroke, excluding, one at a time, each component of the HRDea-score (n=35,496).**

|                                         | HRDea-score            |                        |                        |                         | P-trend |
|-----------------------------------------|------------------------|------------------------|------------------------|-------------------------|---------|
|                                         | Q1 (32-66)<br>(n=8874) | Q2 (67-73)<br>(n=8874) | Q3 (74-79)<br>(n=8874) | Q4 (80-117)<br>(n=8874) |         |
| HR (95% CI)                             |                        |                        |                        |                         |         |
| HRDea-score<br>recalculated excluding*: |                        |                        |                        |                         |         |
| Whole Grains                            | 1.00 [Reference]       | 1.26 (0.87, 1.81)      | 0.75 (0.49, 1.13)      | 0.93 (0.62, 1.40)       | 0.298   |
| Vegetables                              | 1.00 [Reference]       | 1.05 (0.73, 1.51)      | 0.77 (0.52, 1.15)      | 0.80 (0.53, 1.19)       | 0.142   |
| Fruit                                   | 1.00 [Reference]       | 0.91 (0.63, 1.31)      | 0.83 (0.57, 1.21)      | 0.75 (0.50, 1.13)       | 0.147   |
| Potatoes                                | 1.00 [Reference]       | 0.88 (0.61, 1.27)      | 0.85 (0.59, 1.23)      | 0.75 (0.51, 1.10)       | 0.144   |
| Dairy                                   | 1.00 [Reference]       | 1.03 (0.71, 1.51)      | 0.99 (0.67, 1.46)      | 0.78 (0.51, 1.18)       | 0.242   |
| Legumes                                 | 1.00 [Reference]       | 0.82 (0.57, 1.18)      | 0.68 (0.46, 1.00)      | 0.76 (0.51, 1.13)       | 0.126   |
| Soy                                     | 1.00 [Reference]       | 1.17 (0.82, 1.68)      | 0.63 (0.42, 0.96)      | 0.85 (0.57, 1.27)       | 0.129   |
| Beef, Lamb, Pork                        | 1.00 [Reference]       | 1.29 (0.90, 1.84)      | 0.69 (0.45, 1.05)      | 0.89 (0.59, 1.33)       | 0.160   |
| Chicken                                 | 1.00 [Reference]       | 1.23 (0.85, 1.76)      | 0.66 (0.43, 1.01)      | 0.90 (0.60, 1.34)       | 0.196   |
| Eggs                                    | 1.00 [Reference]       | 0.97 (0.67, 1.41)      | 0.80 (0.54, 1.18)      | 0.73 (0.48, 1.10)       | 0.085   |
| Fish                                    | 1.00 [Reference]       | 1.27 (0.88, 1.81)      | 0.67 (0.44, 1.02)      | 0.92 (0.61, 1.37)       | 0.216   |
| Nuts                                    | 1.00 [Reference]       | 1.25 (0.87, 1.79)      | 0.69 (0.45, 1.05)      | 0.92 (0.61, 1.38)       | 0.242   |
| Sugars                                  | 1.00 [Reference]       | 1.27 (0.89, 1.82)      | 0.71 (0.47, 1.07)      | 0.89 (0.59, 1.34)       | 0.187   |
| Fats ratio                              | 1.00 [Reference]       | 1.16 (0.81, 1.67)      | 0.76 (0.51, 1.14)      | 0.83 (0.55, 1.25)       | 0.147   |

\* Adjusted for: sex, age, educational level, smoking status, alcohol consumption, physical activity, energy intake, BMI, hypertension, and cholesterol levels.

Q1 = first quartile

Q2 = second quartile

Q3 = third quartile

Q4 = fourth quartile

HR = Hazard Ratios

95% CI = 95% Confidence Intervals

p-trend = p-value for trend

HRDea-score = Energy-adjusted Healthy Reference Diet score

**Table S9. Hazard ratios (HRs) and 95% confidence intervals (CIs) for the association between quartiles of the HRDea-score and incidence of CVD, CHD, total stroke, ischaemic and haemorrhagic stroke, applying IPTWs (n=35,496).**

|                               | Quartiles of HRDea-score (range) |                        |                        |                         | <i>P</i> -trend |
|-------------------------------|----------------------------------|------------------------|------------------------|-------------------------|-----------------|
|                               | Q1 (32-66)<br>(n=8874)           | Q2 (67-73)<br>(n=8874) | Q3 (74-79)<br>(n=8874) | Q4 (80-117)<br>(n=8874) |                 |
| CVD, <i>n</i>                 | 1100                             | 1140                   | 979                    | 934                     |                 |
| Persons-years                 | 122061                           | 125076                 | 127678                 | 136736                  |                 |
| Unadjusted Model              | 1.00 [ref]                       | 1.00 (0.91 – 1.09)     | 0.83 (0.75 – 0.91)     | 0.78 (0.69 – 0.89)      | <0.001          |
| Model 1*                      | 1.00 [ref]                       | 0.99 (0.90 – 1.09)     | 0.83 (0.76 – 0.92)     | 0.80 (0.71 – 0.91)      | <0.001          |
| Model 2†                      | 1.00 [ref]                       | 1.00 (0.91 – 1.09)     | 0.84 (0.76 – 0.92)     | 0.83 (0.74 – 0.93)      | <0.001          |
| Model 3‡                      | 1.00 [ref]                       | 1.00 (0.91 – 1.10)     | 0.83 (0.75 – 0.92)     | 0.82 (0.73 – 0.92)      | <0.001          |
| CHD, <i>n</i>                 | 617                              | 614                    | 542                    | 544                     |                 |
| Persons-years                 | 124454                           | 127252                 | 129333                 | 138622                  |                 |
| Unadjusted Model              | 1.00 [ref]                       | 1.00 (0.88 – 1.13)     | 0.88 (0.77 – 1.00)     | 0.83 (0.71 – 0.98)      | 0.007           |
| Model 1*                      | 1.00 [ref]                       | 1.00 (0.88 – 1.13)     | 0.89 (0.78 – 1.01)     | 0.85 (0.72 – 0.99)      | 0.016           |
| Model 2†                      | 1.00 [ref]                       | 1.01 (0.89 – 1.14)     | 0.89 (0.78 – 1.02)     | 0.87 (0.75 – 1.02)      | 0.033           |
| Model 3‡                      | 1.00 [ref]                       | 1.00 (0.89 – 1.13)     | 0.88 (0.77 – 1.00)     | 0.86 (0.74 – 1.00)      | 0.014           |
| Total Stroke, <i>n</i>        | 197                              | 233                    | 203                    | 205                     |                 |
| Persons-years                 | 127190                           | 129916                 | 131765                 | 141150                  |                 |
| Unadjusted Model              | 1.00 [ref]                       | 1.15 (0.93 – 1.42)     | 0.89 (0.72 - 1.11)     | 0.94 (0.69 – 1.27)      | 0.380           |
| Model 1*                      | 1.00 [ref]                       | 1.14 (0.93 – 1.41)     | 0.90 (0.73 - 1.12)     | 0.98 (0.72 – 1.32)      | 0.570           |
| Model 2†                      | 1.00 [ref]                       | 1.14 (0.93 – 1.41)     | 0.92 (0.74 – 1.14)     | 1.00 (0.75 – 1.34)      | 0.692           |
| Model 3‡                      | 1.00 [ref]                       | 1.15 (0.93 – 1.42)     | 0.91 (0.73 – 1.14)     | 0.99 (0.74 – 1.32)      | 0.618           |
| Ischaemic stroke, <i>n</i>    | 112                              | 118                    | 125                    | 123                     |                 |
| Persons-years                 | 127545                           | 130323                 | 131980                 | 141489                  |                 |
| Unadjusted Model              | 1.00 [ref]                       | 1.07 (0.80 – 1.42)     | 0.99 (0.75 - 1.31)     | 1.04 (0.66 – 1.61)      | 0.951           |
| Model 1*                      | 1.00 [ref]                       | 1.06 (0.80 – 1.41)     | 1.00 (0.76 - 1.33)     | 1.08 (0.70 – 1.67)      | 0.779           |
| Model 2†                      | 1.00 [ref]                       | 1.06 (0.80 – 1.41)     | 1.03 (0.77 – 1.37)     | 1.10 (0.74 – 1.65)      | 0.673           |
| Model 3‡                      | 1.00 [ref]                       | 1.06 (0.80 – 1.42)     | 1.02 (0.76 – 1.35)     | 1.08 (0.73 – 1.60)      | 0.750           |
| Haemorrhagic stroke, <i>n</i> | 54                               | 76                     | 45                     | 58                      |                 |
| Persons-years                 | 127921                           | 130593                 | 132462                 | 141839                  |                 |
| Unadjusted Model              | 1.00 [ref]                       | 1.28 (0.88 – 1.88)     | 0.68 (0.44 - 1.05)     | 0.90 (0.57 – 1.40)      | 0.222           |
| Model 1*                      | 1.00 [ref]                       | 1.27 (0.87 – 1.86)     | 0.68 (0.45 - 1.05)     | 0.94 (0.60 – 1.45)      | 0.310           |
| Model 2†                      | 1.00 [ref]                       | 1.28 (0.88 – 1.88)     | 0.70 (0.46 – 1.08)     | 0.97 (0.62 – 1.52)      | 0.414           |
| Model 3‡                      | 1.00 [ref]                       | 1.29 (0.88 – 1.88)     | 0.70 (0.46 – 1.08)     | 0.97 (0.62 – 1.53)      | 0.422           |

\* Adjusted for age and sex.

† Adjusted for age, sex, educational level, smoking status, alcohol consumption, physical activity, and energy intake.

‡ Adjusted for age, sex, educational level, smoking status, alcohol consumption, physical activity, energy intake, BMI, hypertension, and total cholesterol levels.

Q1 = first quartile

Q2 = second quartile

Q3 = third quartile

Q4 = fourth quartile

HRs = Hazard Ratios

95% CI = 95% Confidence Intervals

p-trend = p-value for trend

HRDea-score = Energy-adjusted Healthy Reference Diet score

IPTWs = Inverse probability of treatment weights

CVD = cardiovascular disease

CHD = coronary heart disease

**Table S10. Hazard ratios (HRs) and 95% confidence intervals (CIs) for the association between quartiles of the mMDS and incidence of CVD, CHD, total stroke, ischaemic and haemorrhagic stroke ( $n=35,496$ ).**

|                               | Quartiles of mMED (range)    |                         |                         |                           | <i>P</i> -trend |
|-------------------------------|------------------------------|-------------------------|-------------------------|---------------------------|-----------------|
|                               | Q1 (0 - 3)<br>( $n=10,738$ ) | Q2 (4)<br>( $n=8,160$ ) | Q3 (5)<br>( $n=7,910$ ) | Q4 (6-9)<br>( $n=8,688$ ) |                 |
| CVD, <i>n</i>                 | 1466                         | 979                     | 869                     | 839                       |                 |
| Persons-years                 | 152651                       | 116652                  | 113355                  | 124945                    |                 |
| Unadjusted Model              | 1.00 [ref]                   | 0.87 (0.80 – 0.95)      | 0.80 (0.73 – 0.87)      | 0.70 (0.64 – 0.76)        | <0.001          |
| Model 1*                      | 1.00 [ref]                   | 0.87 (0.80 – 0.94)      | 0.82 (0.75 – 0.89)      | 0.74 (0.68 – 0.80)        | <0.001          |
| Model 2†                      | 1.00 [ref]                   | 0.91 (0.84 – 0.98)      | 0.89 (0.82 – 0.97)      | 0.82 (0.75 – 0.90)        | <0.001          |
| Model 3‡                      | 1.00 [ref]                   | 0.91 (0.83 – 0.98)      | 0.91 (0.83 – 0.99)      | 0.84 (0.77 – 0.92)        | <0.001          |
| CHD, <i>n</i>                 | 822                          | 564                     | 489                     | 480                       |                 |
| Persons-years                 | 155675                       | 118574                  | 115141                  | 126718                    |                 |
| Unadjusted Model              | 1.00 [ref]                   | 0.90 (0.81 – 1.00)      | 0.80 (0.72 – 0.90)      | 0.72 (0.64 – 0.80)        | <0.001          |
| Model 1*                      | 1.00 [ref]                   | 0.89 (0.80 – 0.99)      | 0.82 (0.73 – 0.92)      | 0.74 (0.66 – 0.83)        | <0.001          |
| Model 2†                      | 1.00 [ref]                   | 0.94 (0.84 – 1.04)      | 0.89 (0.80 – 1.00)      | 0.84 (0.75 – 0.94)        | 0.002           |
| Model 3‡                      | 1.00 [ref]                   | 0.94 (0.84 – 1.05)      | 0.91 (0.81 – 1.02)      | 0.86 (0.76 – 0.96)        | 0.008           |
| Total Stroke, <i>n</i>        | 308                          | 179                     | 173                     | 178                       |                 |
| Persons-years                 | 159229                       | 121253                  | 117295                  | 128806                    |                 |
| Unadjusted Model              | 1.00 [ref]                   | 0.76 (0.63 – 0.92)      | 0.76 (0.63 – 0.92)      | 0.72 (0.60 – 0.86)        | <0.001          |
| Model 1*                      | 1.00 [ref]                   | 0.77 (0.64 – 0.93)      | 0.81 (0.67 – 0.98)      | 0.79 (0.66 – 0.95)        | 0.013           |
| Model 2†                      | 1.00 [ref]                   | 0.80 (0.67 – 0.97)      | 0.88 (0.73 – 1.06)      | 0.88 (0.73 – 1.07)        | 0.225           |
| Model 3‡                      | 1.00 [ref]                   | 0.80 (0.66 – 0.96)      | 0.88 (0.73 – 1.07)      | 0.89 (0.74 – 1.08)        | 0.264           |
| Ischaemic stroke, <i>n</i>    | 180                          | 99                      | 88                      | 111                       |                 |
| Persons-years                 | 159652                       | 121545                  | 117689                  | 129088                    |                 |
| Unadjusted Model              | 1.00 [ref]                   | 0.72 (0.57 – 0.92)      | 0.66 (0.51 – 0.86)      | 0.76 (0.60 – 0.97)        | 0.010           |
| Model 1*                      | 1.00 [ref]                   | 0.73 (0.57 – 0.94)      | 0.71 (0.55 – 0.91)      | 0.85 (0.67 – 1.08)        | 0.099           |
| Model 2†                      | 1.00 [ref]                   | 0.76 (0.60 – 0.98)      | 0.78 (0.60 – 1.01)      | 0.96 (0.76 – 1.23)        | 0.550           |
| Model 3‡                      | 1.00 [ref]                   | 0.77 (0.60 – 0.99)      | 0.78 (0.60 – 1.01)      | 0.99 (0.77 – 1.26)        | 0.662           |
| Haemorrhagic stroke, <i>n</i> | 86                           | 53                      | 56                      | 38                        |                 |
| Persons-years                 | 1680423                      | 121878                  | 117855                  | 129472                    |                 |
| Unadjusted Model              | 1.00 [ref]                   | 0.81 (0.58 – 1.14)      | 0.89 (0.63 – 1.24)      | 0.55 (0.38 – 0.80)        | 0.006           |
| Model 1*                      | 1.00 [ref]                   | 0.83 (0.59 – 1.16)      | 0.94 (0.67 – 1.31)      | 0.60 (0.41 – 0.88)        | 0.025           |
| Model 2†                      | 1.00 [ref]                   | 0.84 (0.60 – 1.19)      | 0.98 (0.70 – 1.38)      | 0.63 (0.43 – 0.93)        | 0.060           |
| Model 3‡                      | 1.00 [ref]                   | 0.80 (0.57 – 1.14)      | 0.97 (0.69 – 1.37)      | 0.63 (0.42 – 0.93)        | 0.060           |

\* Adjusted for age and sex.

† Adjusted for age, sex, educational level, smoking status, alcohol consumption, physical activity, and energy intake.

‡ Adjusted for age, sex, educational level, smoking status, alcohol consumption, physical activity, energy intake, BMI, hypertension, and total cholesterol levels.

Q1 = first quartile  
Q2 = second quartile  
Q3 = third quartile  
Q4 = fourth quartile  
HRs = Hazard Ratios  
95% CI = 95% Confidence Intervals  
p-trend = p-value for trend  
mMED = modified Mediterranean Diet  
CVD = cardiovascular disease  
CHD = coronary heart disease

**Table S11. Hazard ratios (HRs) and 95% confidence intervals (CIs) for the association between tertials of the HDI and incidence of CVD, CHD, total stroke, ischaemic and haemorrhagic stroke (n=35,496).**

|                                      | Tertiles of HDI         |                     |                         | <i>P</i> -trend |
|--------------------------------------|-------------------------|---------------------|-------------------------|-----------------|
|                                      | Q1 (1 - 3)<br>(n=7,354) | Q2 (4)<br>(n=7,560) | Q3 (5 - 7)<br>(n=4,964) |                 |
| <b>CVD, <i>n</i></b>                 | 993                     | 892                 | 605                     |                 |
| Persons-years                        | 103818                  | 108461              | 71169                   |                 |
| Unadjusted Model                     | 1.00 [ref]              | 0.86 (0.78 – 0.94)  | 0.89 (0.80 – 0.98)      | 0.008           |
| Model 1*                             | 1.00 [ref]              | 0.84 (0.76 – 0.91)  | 0.80 (0.72 – 0.88)      | <0.001          |
| Model 2†                             | 1.00 [ref]              | 0.88 (0.80 – 0.96)  | 0.91 (0.82 – 1.01)      | 0.036           |
| Model 3‡                             | 1.00 [ref]              | 0.88 (0.81 – 0.97)  | 0.92 (0.83 – 1.02)      | 0.067           |
| <b>CHD, <i>n</i></b>                 | 569                     | 492                 | 329                     |                 |
| Persons-years                        | 105842                  | 110218              | 72303                   |                 |
| Unadjusted Model                     | 1.00 [ref]              | 0.83 (0.73 – 0.93)  | 0.84 (0.74 – 0.97)      | 0.006           |
| Model 1*                             | 1.00 [ref]              | 0.81 (0.72 – 0.92)  | 0.78 (0.68 – 0.90)      | <0.001          |
| Model 2†                             | 1.00 [ref]              | 0.86 (0.76 – 0.97)  | 0.88 (0.77 – 1.01)      | 0.040           |
| Model 3‡                             | 1.00 [ref]              | 0.86 (0.76 – 0.97)  | 0.90 (0.78 – 1.03)      | 0.073           |
| <b>Total Stroke, <i>n</i></b>        | 183                     | 205                 | 115                     |                 |
| Persons-years                        | 108548                  | 112241              | 73867                   |                 |
| Unadjusted Model                     | 1.00 [ref]              | 1.08 (0.88 – 1.32)  | 0.92 (0.73 – 1.16)      | 0.601           |
| Model 1*                             | 1.00 [ref]              | 1.03 (0.85 – 1.26)  | 0.78 (0.61 – 0.98)      | 0.050           |
| Model 2†                             | 1.00 [ref]              | 1.08 (0.88 – 1.32)  | 0.89 (0.70 – 1.12)      | 0.423           |
| Model 3‡                             | 1.00 [ref]              | 1.07 (0.88 – 1.32)  | 0.89 (0.70 – 1.13)      | 0.430           |
| <b>Ischaemic stroke, <i>n</i></b>    | 113                     | 104                 | 73                      |                 |
| Persons-years                        | 108806                  | 112574              | 74017                   |                 |
| Unadjusted Model                     | 1.00 [ref]              | 0.89 (0.68 – 1.16)  | 0.95 (0.71 – 1.27)      | 0.651           |
| Model 1*                             | 1.00 [ref]              | 0.84 (0.65 – 1.10)  | 0.79 (0.59 – 1.06)      | 0.101           |
| Model 2†                             | 1.00 [ref]              | 0.88 (0.67 – 1.15)  | 0.92 (0.68 – 1.24)      | 0.513           |
| Model 3‡                             | 1.00 [ref]              | 0.88 (0.67 – 1.16)  | 0.95 (0.70 – 1.29)      | 0.663           |
| <b>Haemorrhagic stroke, <i>n</i></b> | 42                      | 63                  | 32                      |                 |
| Persons-years                        | 109287                  | 112859              | 74241                   |                 |
| Unadjusted Model                     | 1.00 [ref]              | 1.45 (0.98 – 2.14)  | 1.12 (0.71 – 1.77)      | 0.502           |
| Model 1*                             | 1.00 [ref]              | 1.39 (0.94 – 2.06)  | 0.95 (0.60 – 1.51)      | 0.970           |
| Model 2†                             | 1.00 [ref]              | 1.46 (0.99 - 2.16)  | 0.99 (0.62 – 1.59)      | 0.856           |
| Model 3‡                             | 1.00 [ref]              | 1.41 (0.95 – 2.10)  | 0.92 (0.56 – 1.49)      | 0.898           |

\* Adjusted for age and sex.

† Adjusted for age, sex, educational level, smoking status, alcohol consumption, physical activity, and energy intake.

‡ Adjusted for age, sex, educational level, smoking status, alcohol consumption, physical activity, energy intake, BMI, hypertension, and total cholesterol levels.



Q1 = first quartile  
Q2 = second quartile  
Q3 = third quartile  
Q4 = fourth quartile  
HRs = Hazard Ratios  
95% CI = 95% Confidence Intervals  
p-trend = p-value for trend  
HDI = Healthy Diet Indicator  
CVD = cardiovascular disease  
CHD = coronary heart disease

**Table S12. Hazard ratios (HRs) and 95% confidence intervals (CIs) for the association between PDI and incidence of CVD, CHD, total stroke, ischaemic and haemorrhagic stroke ( $n=35,496$ ).**

|                          | PDI (26 - 73)<br>( $n=35,496$ ) | 95% (CI)      | P-value |
|--------------------------|---------------------------------|---------------|---------|
| CVD, $n$                 | 2,299                           |               |         |
| Persons-years            | 264797                          |               |         |
| Unadjusted Model         | 0.99                            | (0.98 – 0.99) | <0.001  |
| Model 1*                 | 0.99                            | (0.99 – 1.00) | 0.001   |
| Model 2†                 | 0.99                            | (0.99 – 1.00) | 0.039   |
| Model 3‡                 | 1.00                            | (0.99 – 1.00) | 0.404   |
| CHD, $n$                 | 1,309                           |               |         |
| Persons-years            | 269418                          |               |         |
| Unadjusted Model         | 0.99                            | (0.98 – 1.00) | 0.002   |
| Model 1*                 | 0.99                            | (0.99 – 1.00) | 0.047   |
| Model 2†                 | 0.99                            | (0.99 – 1.00) | 0.070   |
| Model 3‡                 | 1.00                            | (0.99 – 1.00) | 0.350   |
| Total Stroke, $n$        | 461                             |               |         |
| Persons-years            | 275323                          |               |         |
| Unadjusted Model         | 0.99                            | (0.98 – 1.00) | 0.043   |
| Model 1*                 | 0.99                            | (0.98 – 1.00) | 0.169   |
| Model 2†                 | 1.00                            | (0.99 – 1.01) | 0.675   |
| Model 3‡                 | 1.00                            | (0.99 – 1.01) | 0.939   |
| Ischaemic stroke, $n$    | 259                             |               |         |
| Persons-years            | 276059                          |               |         |
| Unadjusted Model         | 0.99                            | (0.98 – 1.01) | 0.495   |
| Model 1*                 | 1.00                            | (0.98 – 1.01) | 0.837   |
| Model 2†                 | 1.01                            | (0.99 – 1.02) | 0.489   |
| Model 3‡                 | 1.01                            | (0.99 – 1.02) | 0.284   |
| Haemorrhagic stroke, $n$ | 132                             |               |         |
| Persons-years            | 276958                          |               |         |
| Unadjusted Model         | 0.98                            | (0.95 – 1.00) | 0.028   |
| Model 1*                 | 0.98                            | (0.96 – 1.00) | 0.057   |
| Model 2†                 | 0.99                            | (0.96 – 1.01) | 0.212   |
| Model 3‡                 | 0.99                            | (0.97 – 1.01) | 0.413   |

\* Adjusted for age and sex.

† Adjusted for age, sex, educational level, smoking status, alcohol consumption, physical activity, and energy intake.

‡ Adjusted for age, sex, educational level, smoking status, alcohol consumption, physical activity, energy intake, BMI, hypertension, and total cholesterol levels.

HRs = Hazard Ratios

95% CI = 95% Confidence Intervals

PDI = Plant-based Diet Index

CVD = cardiovascular disease

CHD = coronary heart disease

**Table S13. Correlation coefficients for the HRDea with mMED, HDI, and PDI.**

|              | Correlation Coefficient* |
|--------------|--------------------------|
| HRDea x mMED | $r = 0.38$               |
| HRDea x HDI  | $r = 0.23$               |
| HRDea x PDI  | $\rho = 0.35$            |

\*Calculated using either Pearson's correlation coefficient ( $r$ ), or Spearman's rank correlation ( $\rho$ )

HRDea = Energy-adjusted Healthy Reference Diet

mMED = modified Mediterranean Diet

HDI = Healthy Diet Indicator

PDI = Plant-based Diet Index

**Table S14. Percent difference for the association between quartiles of the HRDea-score and environmental indicators, adjusted for age, sex, and energy intake (n=35,496).**

|                                                    | Q4 vs Q1* | 95% CI        |
|----------------------------------------------------|-----------|---------------|
| GHGE (kg CO <sub>2</sub> -eq)                      | -2.4      | (-5.0, 0.2)   |
| Land Use (m <sup>2</sup> /y)                       | -3.9      | (-5.2, -2.6)  |
| Blue water use (m <sup>3</sup> /d)                 | 32.1      | (28.5, 35.7)  |
| Freshwater eutrophication (Kg P-eq)                | -0.5      | (-2.6, 1.6)   |
| Marine eutrophication (Kg N-eq)                    | -3.3      | (-5.8, -0.8)  |
| Terrestrial acidification (Kg SO <sub>2</sub> -eq) | -7.7      | (-10.8, -4.6) |

\* Expressed in %

Q1 = first quartile

Q4 = fourth quartile

Kg CO<sub>2</sub>-eq = kilograms of carbon dioxide equivalent

m<sup>2</sup> per year = square meters per year

m<sup>3</sup> per day = cubic meters per year

Kg P-eq = kilograms of phosphorus equivalent

Kg N-eq = kilograms of nitrogen equivalent

Kg SO<sub>2</sub>-eq = kilograms of sulphur dioxide equivalent

**Figure S1. Flowchart of the study population.**

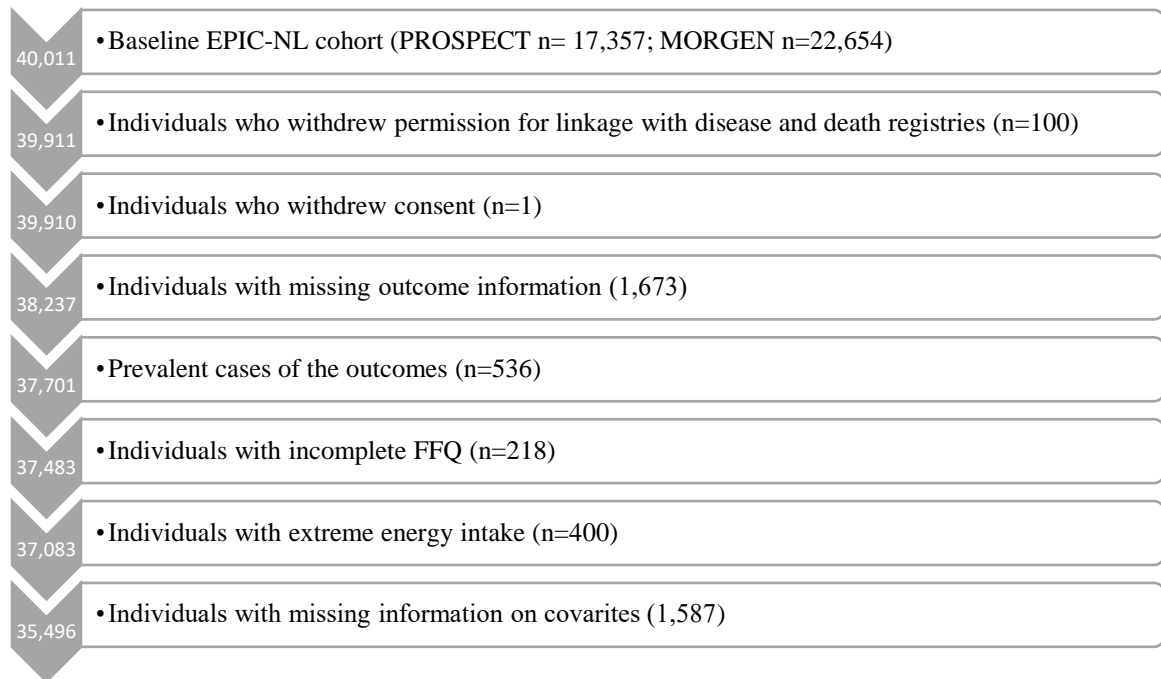

**Figure S2. Hazard ratios (HRs) and 95% confidence intervals (CIs) for the association between HRDea-score and CVD, stratified by sex, age, BMI, and educational level.**

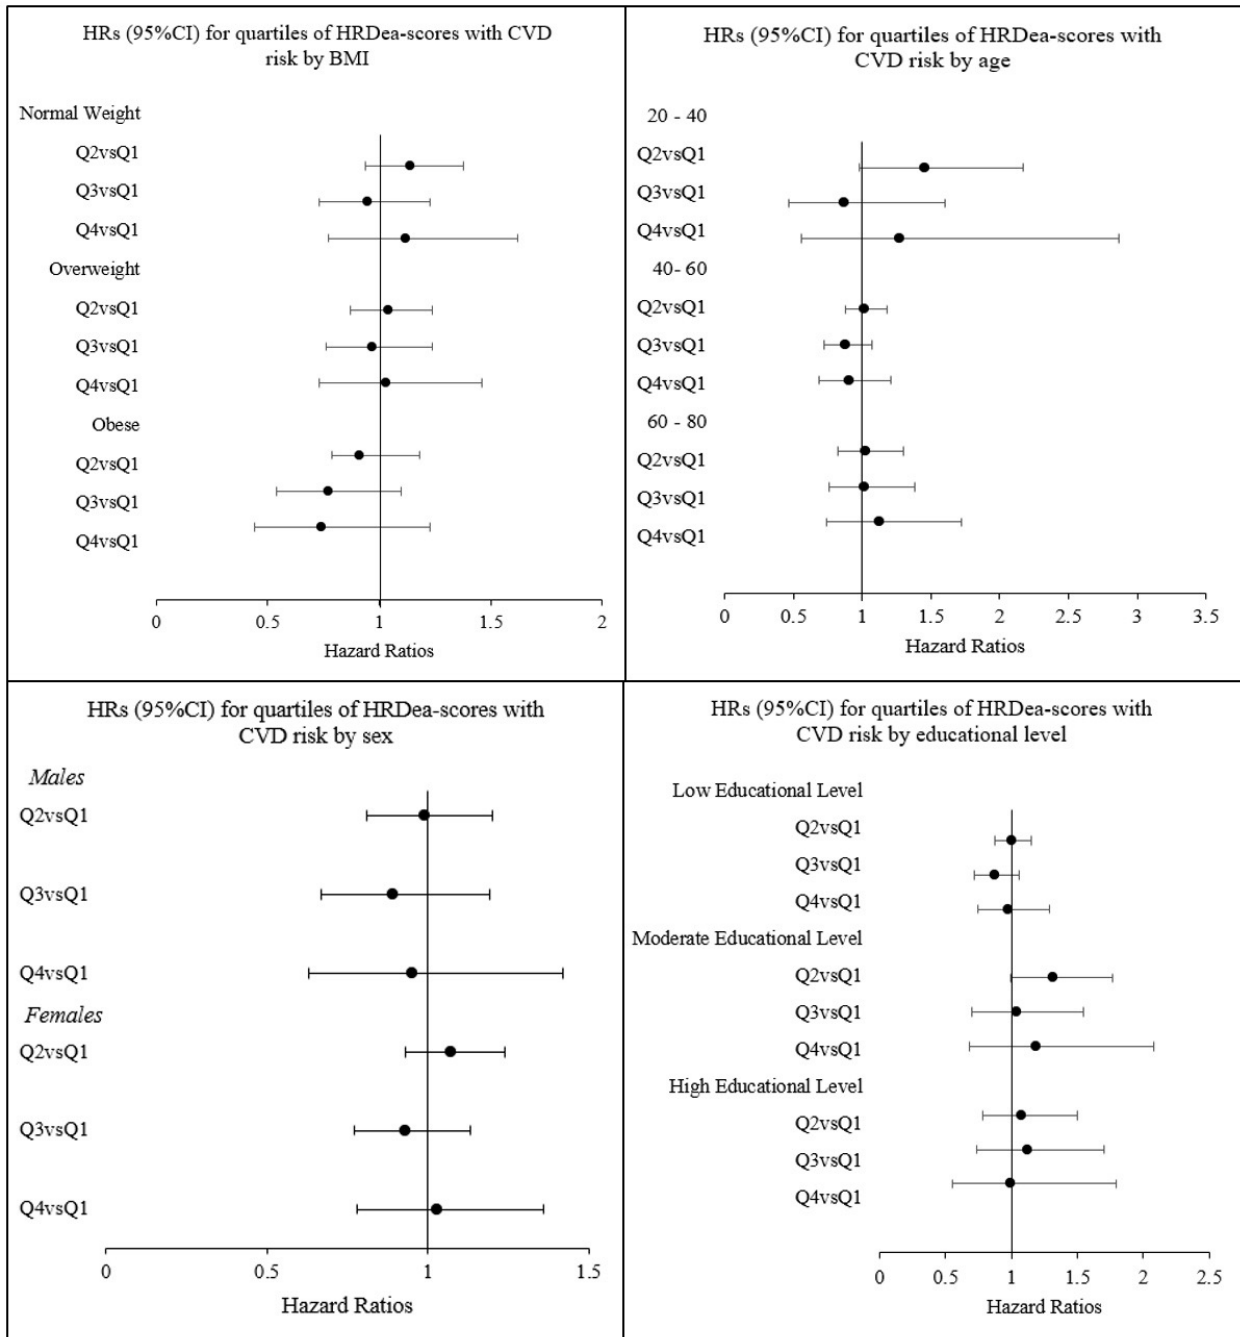

HRs = Hazard Ratios  
 95% CI = 95% confidence intervals  
 HRDea-score = Energy-adjusted Healthy Reference Diet score  
 CVD = cardiovascular disease  
 BMI = Body Mass Index

**Figure S3. Hazard ratios (HRs) and 95% confidence intervals (CIs) for the association between HRDea-score and CHD, stratified by sex, age, BMI, and educational level.**

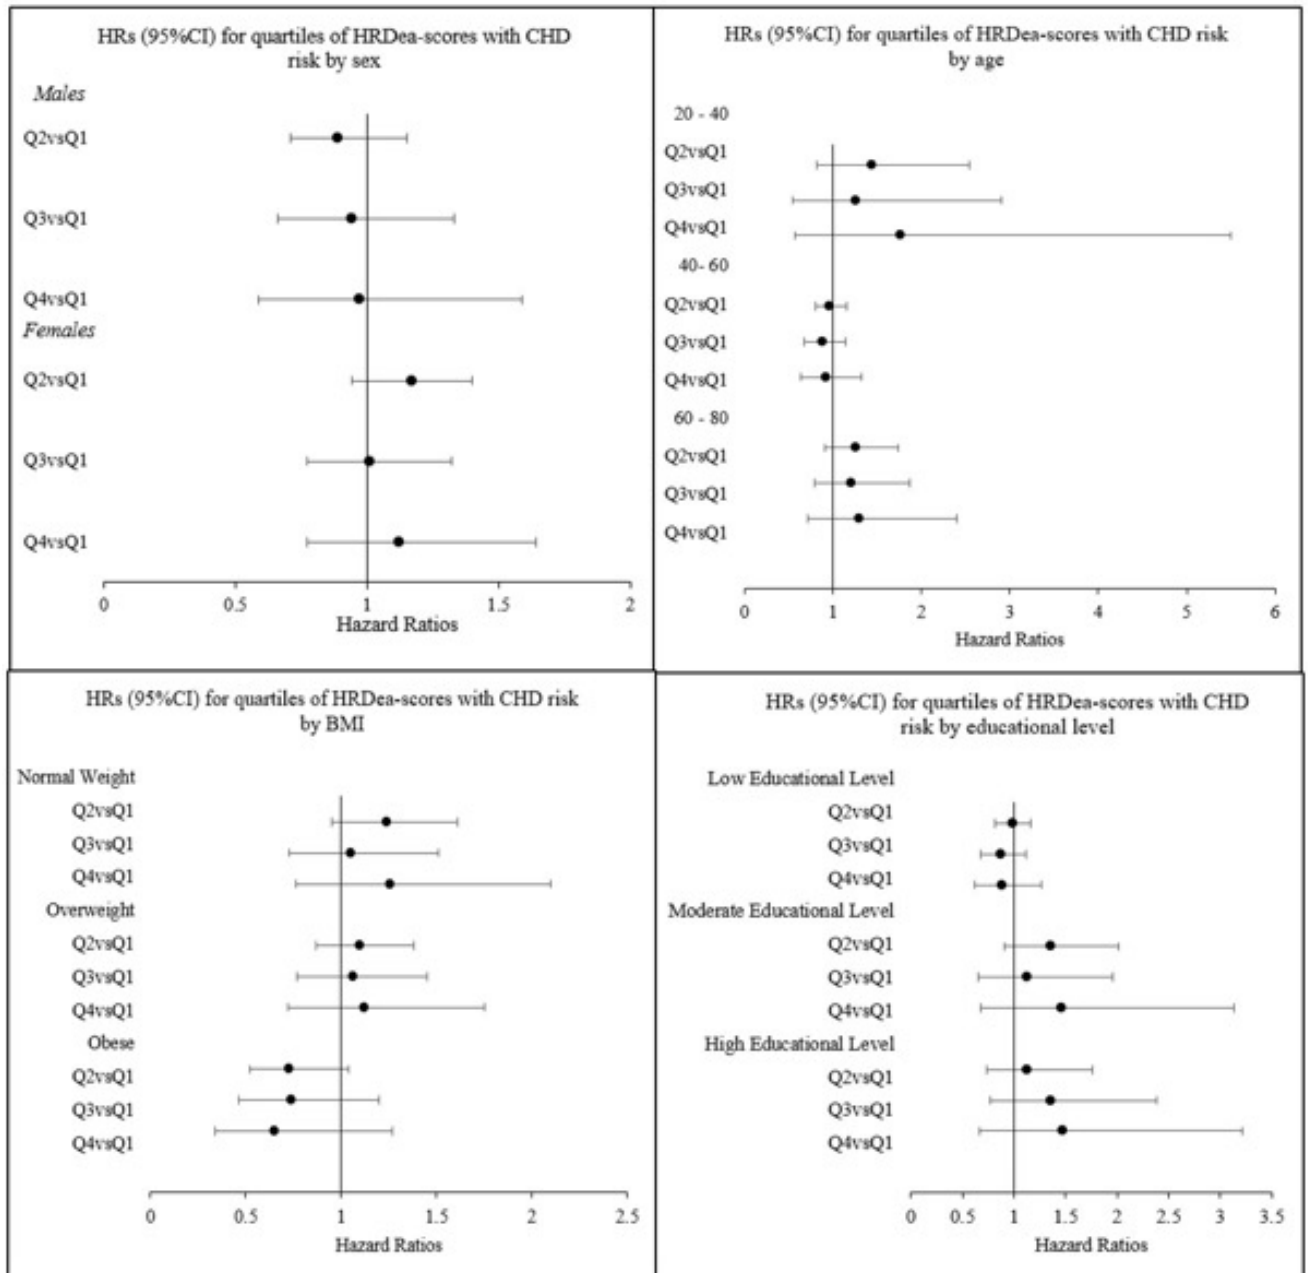

HRs = Hazard Ratios

95% CI = 95% confidence intervals

HRDea-score = Energy-adjusted Healthy Reference Diet score

CHD = coronary heart disease

BMI = Body Mass Index



**Figure S4. Hazard ratios (HRs) and 95% confidence intervals (CIs) for the association between HRDea-score and total stroke, stratified by sex, age, BMI, and educational level.**

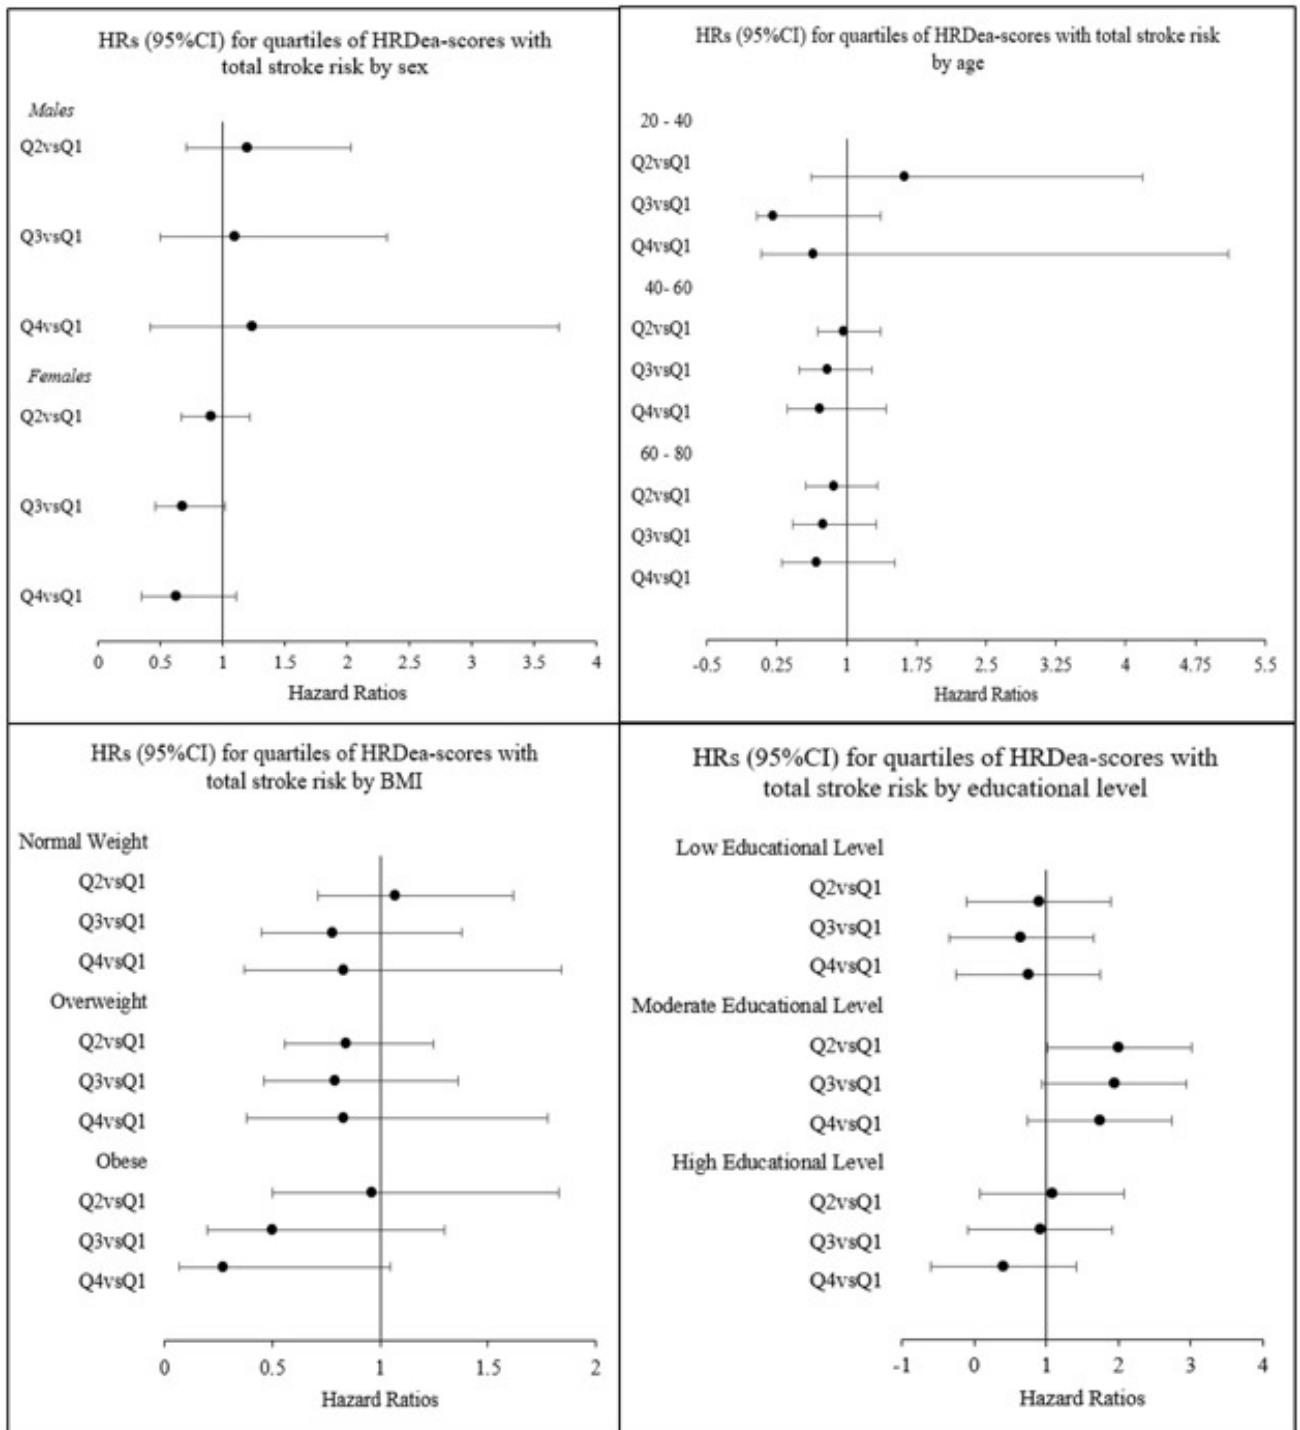

HRs = Hazard Ratios  
 95% CI = 95% confidence intervals  
 HRDea-score = Energy-adjusted Healthy Reference Diet score  
 BMI = Body Mass Index

**Figure S5. Hazard ratios (HRs) and 95% confidence intervals (CIs) for the association between HRDea-score and ischemic stroke, stratified by sex, age, BMI, and educational level.**

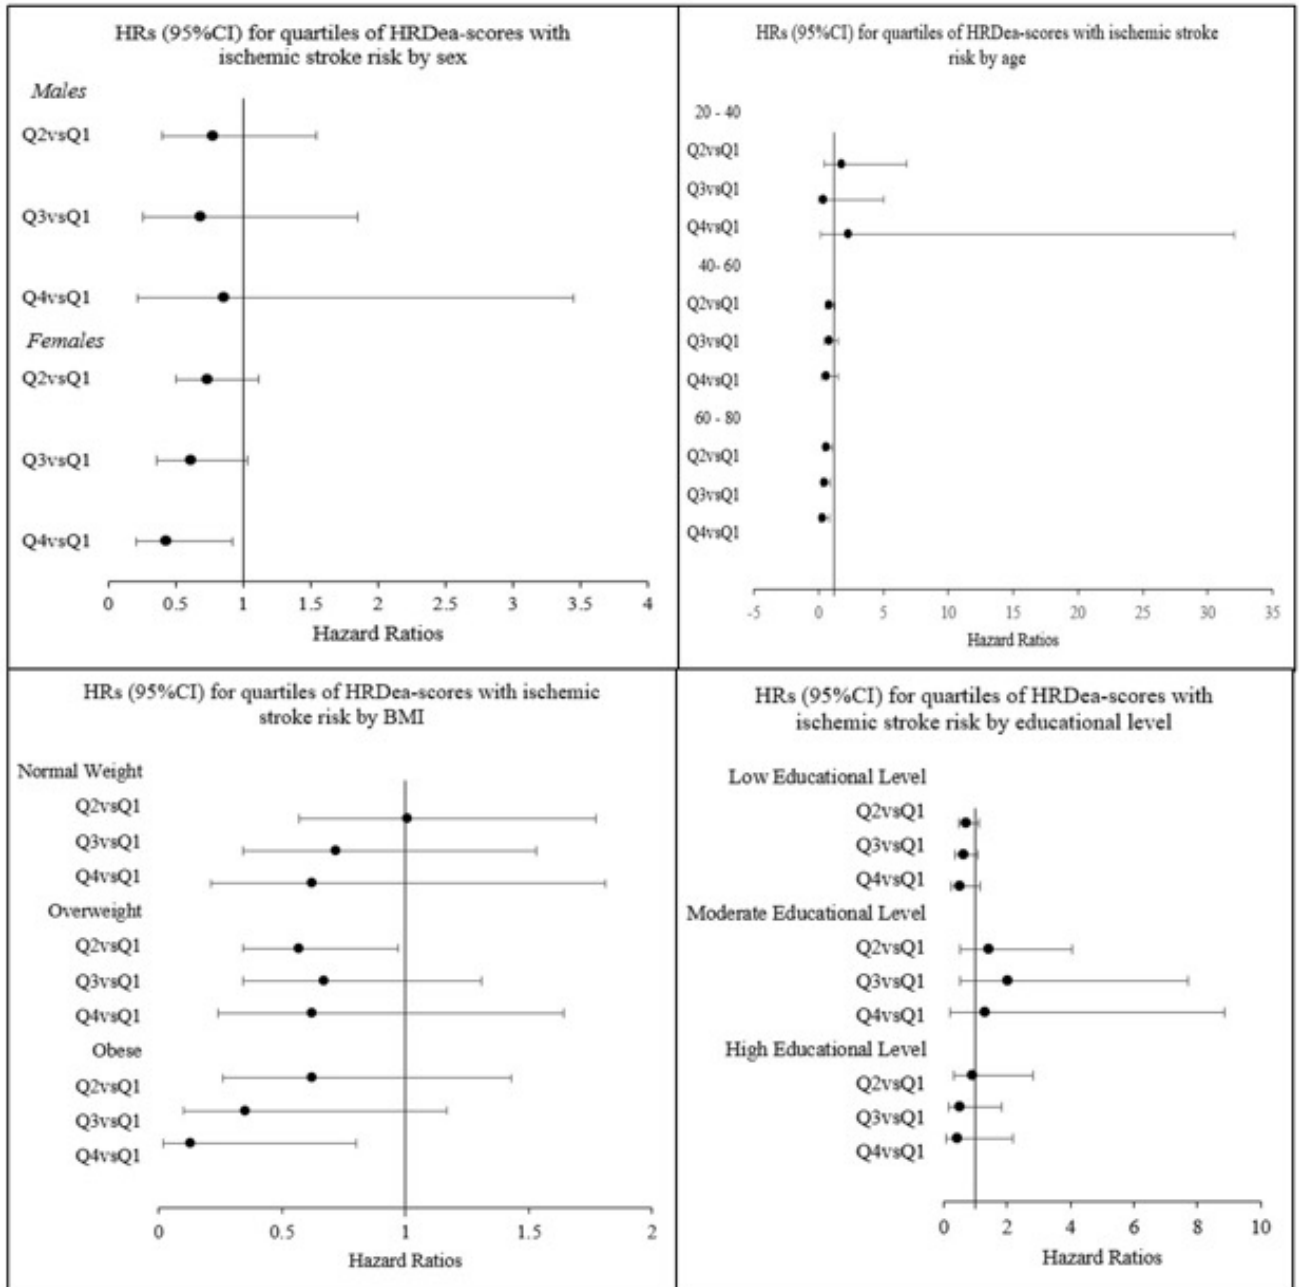

HRs = Hazard Ratios

95% CI = 95% confidence intervals

HRDea-score = Energy-adjusted Healthy Reference Diet score

BMI = Body Mass Index

**Figure S6. Hazard ratios (HRs) and 95% confidence intervals (CIs) for the association between HRDea-score and haemorrhagic stroke, stratified by sex, age, BMI, and educational level.**

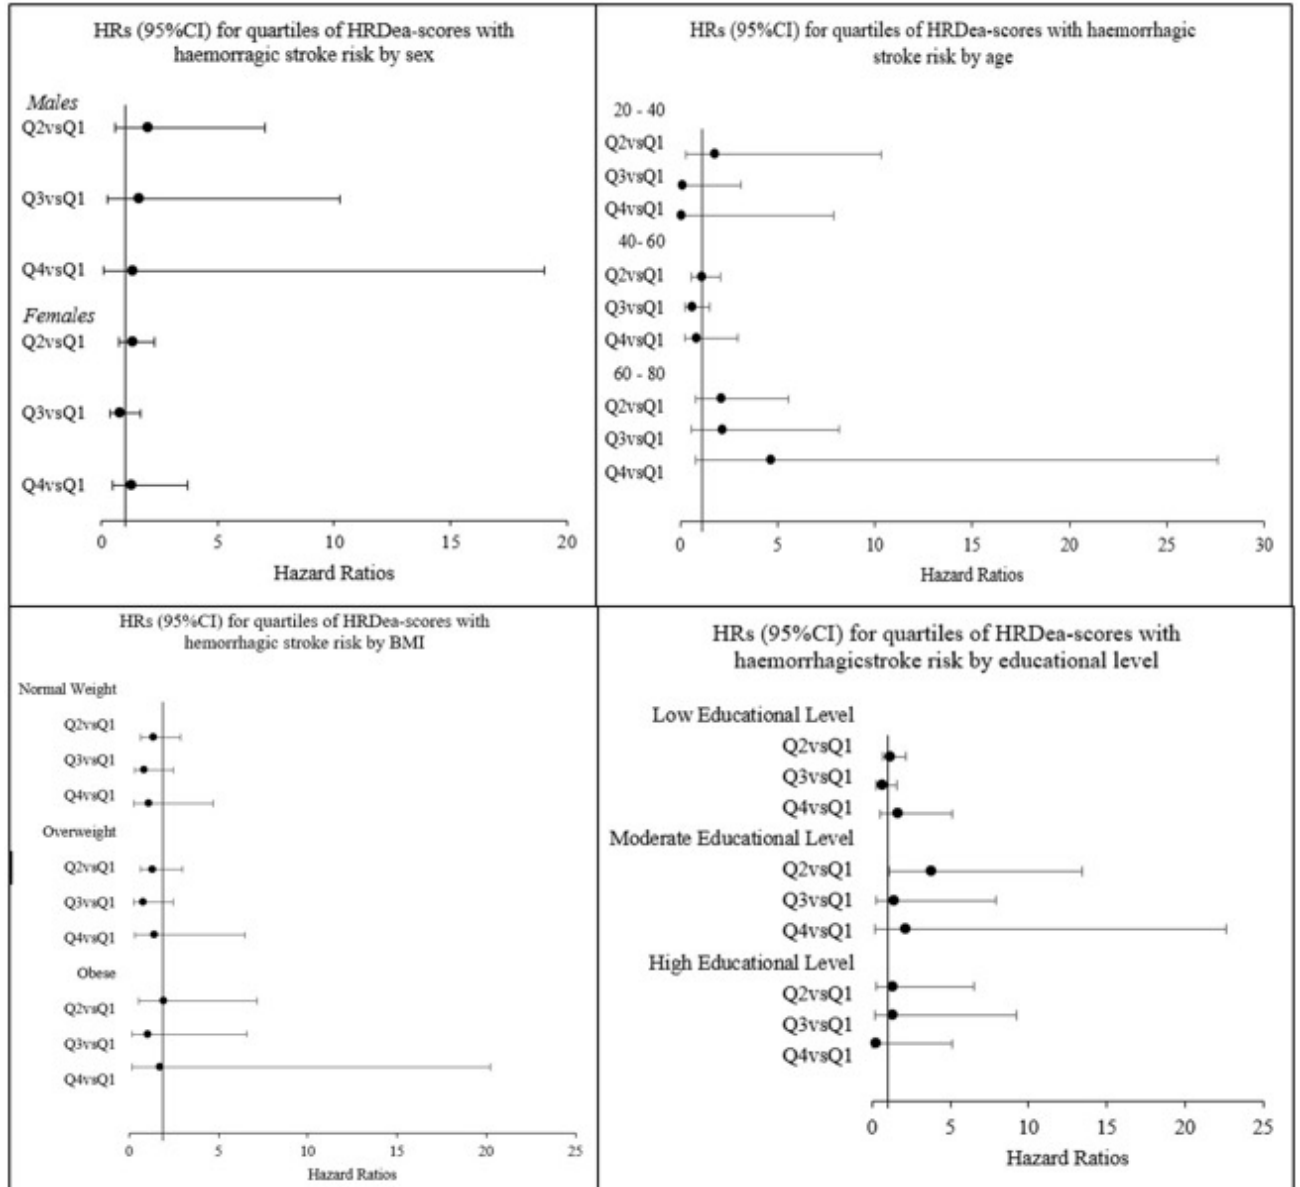

HRs = Hazard Ratios

95% CI = 95% confidence intervals

HRDea-score = Energy-adjusted Healthy Reference Diet score

BMI = Body Mass Index

**Figure S7. Hazard ratios (HRs) and 95% confidence intervals (CIs) for the association between HRDea-score and CVD, CHD, total stroke, ischemic stroke, and haemorrhagic stroke, using restricted cubic splines.**

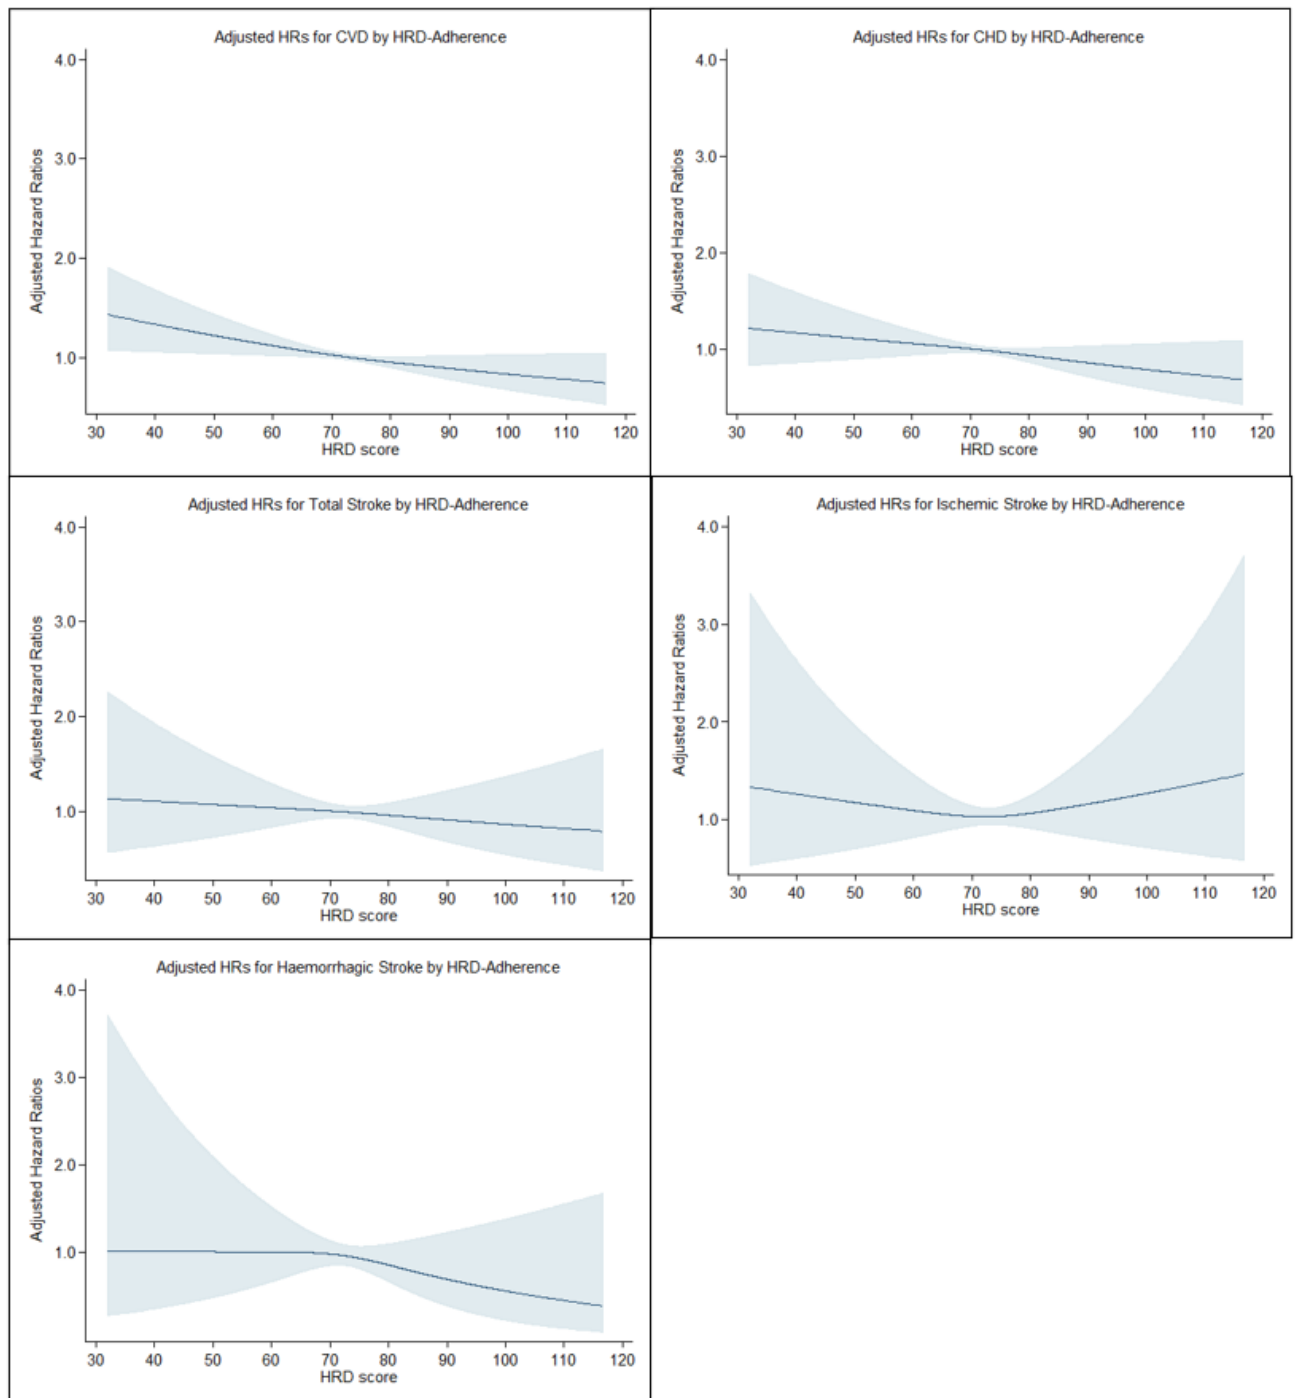

95% CI = 95% confidence intervals

HRDea-score = Energy-adjusted Healthy Reference Diet score

CVD = cardiovascular disease

CHD = coronary heart disease

**Figure S8. Regression coefficients and 95% CI for the associations between HRDea-score and greenhouse gas emissions, land use, blue water use, freshwater use, marine eutrophication, and terrestrial acidification, using restricted cubic splines.**

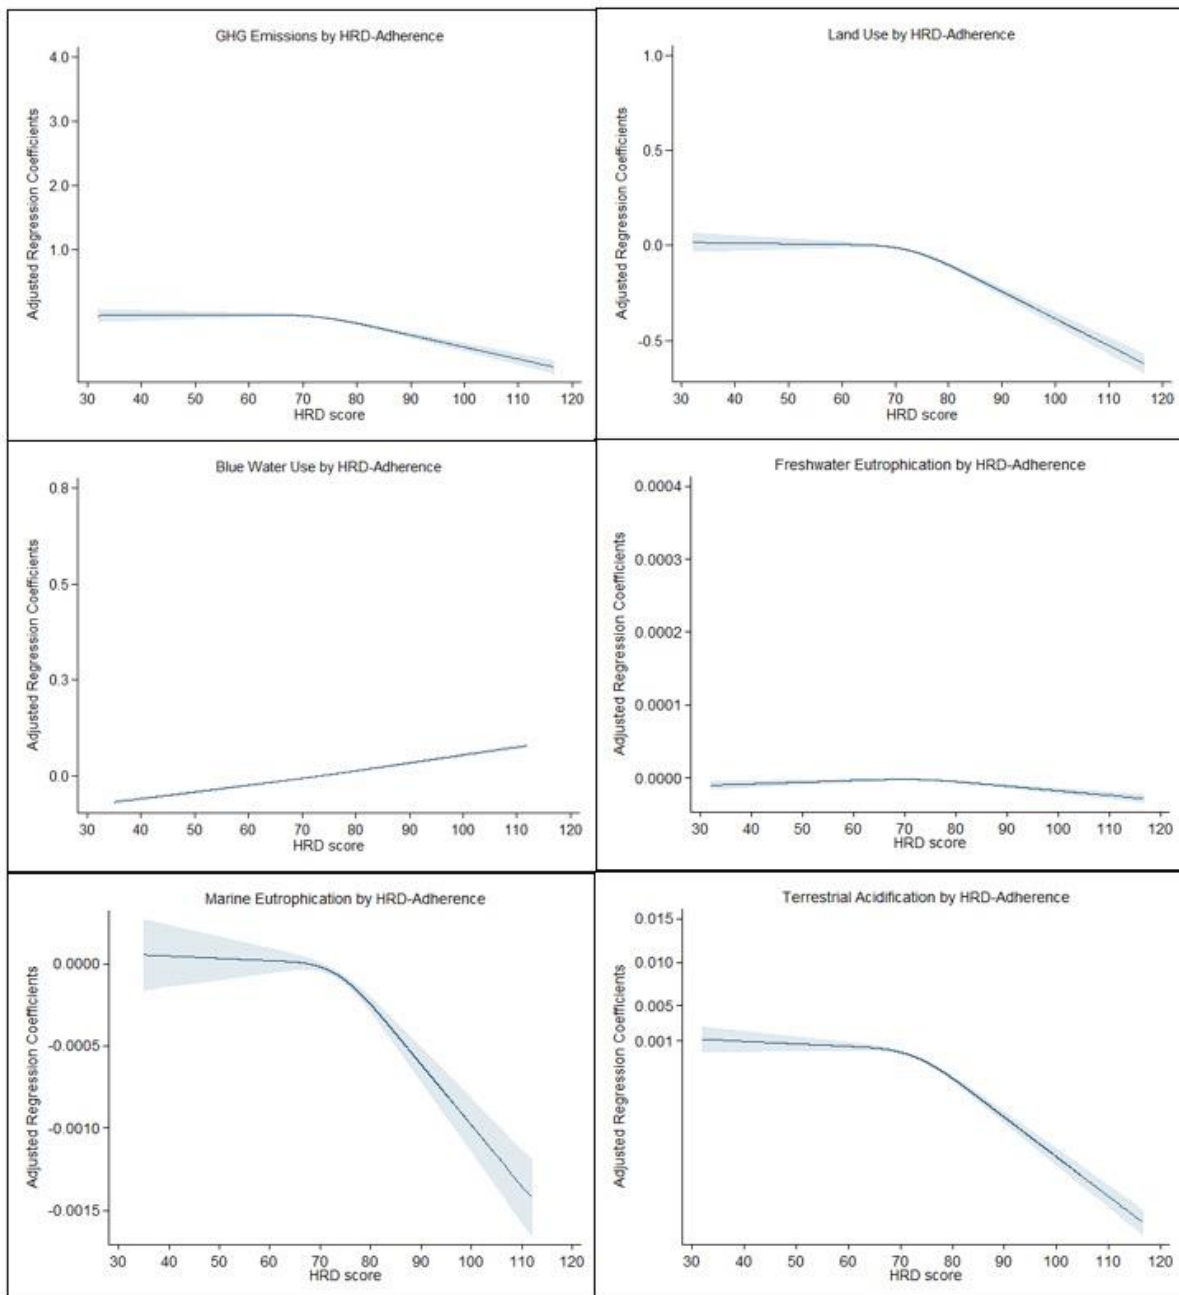

95% CI = 95% confidence intervals

HRDea-score = Energy-adjusted Healthy Reference Diet score

GHG = Greenhouse Gas
